# Supplementary material
Source: publisher figshare collection journal article supplement (https://gsajournals.figshare.com/articles/dataset/_/13557194)
Supplement: Supplementary file 1 [file 1]

## Sheet: Table S1
Table S1. let-7-family microRNA sequences in Caenorhabditis species.
Species	let-7 sequence	mir-48 sequence(s)	mir-84 sequence(s)	mir-241 sequence	mir-795 sequence	mir-12463 sequence(s)	lin-4 sequence(s)
C. tribulationis	TGAGGTAGTAGGTTGTATAGTT	TGAGGTAGGCTCAGTAGATGCGA	TGAGGTAGTTTGTAATGCTGTCG	TGAGGTAGGTGCGAGAAATGA	no mir-795	no mir-12463	TCCCTGAGACCTCAAGTGTGA
C. zanzibari	TGAGGTAGTAGGTTGTATAGTT	TGAGGTAGGCTCAGTAGATGCGA	TGAGGTAGTTTGTAATGTTGTG	TGAGGTAGGTGCGAGAAATGA	no mir-795	no mir-12463	TCCCTGAGACCTCAAGTGTGA
C. sinica	TGAGGTAGTAGGTTGTATAGTT	TGAGGTAGGCTCAGTAGATGCGA	TGAGGTAGTTTGTAATGCTGTG	TGAGGTAGGTGCGAGAAATGA	no mir-795	no mir-12463	TCCCTGAGACCTCAAGTGTGA
C. nigoni	TGAGGTAGTAGGTTGTATAGTT	TGAGGTAGGCTCAGTAGATGCGA	TGAGGTAGTTTGCAATGCTGTCG	TGAGGTAGGTGCGAGAAATGA	no mir-795	no mir-12463	TCCCTGAGACCTCAAGTGTGA
C. briggsae	TGAGGTAGTAGGTTGTATAGTT2	TGAGGTAGGCTCAGTAGATGCGA2	TGAGGTAGTTTGCAATGCTGTC2	TGAGGTAGGTGTGAGAAATGA2	no mir-795	no mir-12463	TCCCTGAGACCTCAAGTGTGA2
C. remanei	TGAGGTAGTAGGTTGTATAGTT2	TGAGGTAGGCTCAGTAGATGCG2	TGAGGTAGTTTGTAATGCTGTCG2	AGAGGTAGGTGCGAGAAATG2	no mir-795	no mir-12463	TCCCTGAGACCTCAAGTGTGA2
C. latens	TGAGGTAGTAGGTTGTATAGTT	TGAGGTAGGCTCAGTAGATGCGA (2 copies)	TGAGGTAGTTTGTAATGCTGTCG	AGAGGTAGGTGCGAGAAATGA (2 copies)	no mir-795	no mir-12463	TCCCTGAGACCTCAAGTGTGA
C. brenneri	TGAGGTAGTAGGTTGTATAGTT2	TGAGGTAGGCTCAGTAGATGCGA2 (2 copies)	TGAGGTAGTTTGGAAATGCTGTCG2	AGAGGTAGGTGCGAGAAATGA2 (2 copies)	no mir-795	no mir-12463	TCCCTGAGACCTCAAGTGTGA2 (2 copies)
C. wallacei	TGAGGTAGTAGGTTGTATAGTT	TGAGGTAGGCTCAGTAGATGCGA	TGAGGTAGTTTGTAATGCTGTCG	TGAGGTAGGTGCGAGAAATGA	no mir-795	no mir-12463	TCCCTGAGACCTCAAGTGTGA
C. tropicalis	TGAGGTAGTAGGTTGTATAGTT	TGAGGTAGGCTCAGTAGATGCGA	TGAGGTAGTTTGTAATGCTGTCG	TGAGGTAGGTGCGAGAAATGA	no mir-795	no mir-12463	TCCCTGAGACCTCAAGTGTGA
C. doughertyi	TGAGGTAGTAGGTTGTATAGTT	TGAGGTAGGCTCAGTAGATGCGA (2 copies)	TGAGGTAGTTTGTAATGCTGTCG	TGAGGTAGATGTGAGAAATGA (2 copies)	no mir-795	no mir-12463	TCCCTGAGACCTCAAGTGTGA
				TGAGGTAGGTGCGGGAAAGG
C. inopinata	TGAGGTAGTAGGTTGTATAGTT1	TGAGGTAGGCTCAGTAGATGCGA1	TGAGGTAGTTTGAAATGCTGTCG	TGAGGTAGGTGCGAGAAATGA1	no mir-795	no mir-12463	TCCCTGAGACCTCAAGTGTGA1
C. elegans	TGAGGTAGTAGGTTGTATAGTT1,2,3	TGAGGTAGGCTCAGTAGATGCGA1,2,3	TGAGGTAGTATGTAATATTGTAGA1,2,3	TGAGGTAGGTGCGAGAAATGA1,2,3	TGAGGTAGATTGATCAGCGAGCTT1,2,3	no mir-12463	TCCCTGAGACCTCAAGTGTGA1,2,3
C. kamaaina	TGAGGTAGTAGGTTGTATAGTT1	TGAGGTAGGCTCAGTAGATGTGA1	TGAGGTAGTTTGTAATGTTGTCG	TGAGGTAGGTGCGAGAAATGA1	no mir-795	no mir-12463	TCCCTGAGACCTCAAGTGTGA1
C. waitukubuli	no let-7	TGAGGTAGGCTCAGTAGATGTGA1	TGAGGTAGTTTGTAATGTTGTCG#	TGAGGTAGGTGCGAGAAATGA1	no mir-795	TGAGGTAGAATCAATTGCAGTGA#	TCCCTGAGACCTCAAGTGTGA1 (2 copies)
C. panamensis	no let-7	TGAGGTAGGCTCAGTAGATGTGA1*	TGAGGTAGTTTGCAATGTTGTCG#	TGAGGTAGGTGCGAGAAATGA1*	no mir-795	TGAGGTAGGATCAATTGCAGTGA#	TCCCTGAGACCTCAAGTGTGA1
		TGAGGTAGGCTCAGTAGTTGTGA1*		TGAGGTAGCGTGCGAGAAATGA1*#
		TGAGGTAGGCTCAGTAGCAGTGA1*
		TGAGGTAGGCTCAGTGACGTGA1*
C. nouraguensis	no let-7	TGAGGTAGGCTCAGTAGATGTGA1	TGAGGTAGTTTGCAATGTTGTCG*# (2 copies)	TGAGGTAGGTGCGAGAAATGA1	no mir-795	TGAGGTAGGATCAATTGGAGTGA#	TCCCTGAGACCTCAAGTGTGA1
			TGAGGTAGTTTGCAATGTTGTAG*#			TGAGGTAGAATCAATTGGAGTGA#
						TGAGGTAGAAGCAATTGCAGTGA#
C. becei	no let-7	TGAGGTAGGCTCAGTAGATGTGA1	TGAGGTAGTTTGCAATGTTGTCG# (3 copies)	TGAGGTAGGTGCGAGAAATGA1	no mir-795	TGAGGTAGAATCAATTGCAGTGA#	TCCCTGAGACCTCAAGTGTGA1
						TGAGGTAGAATCAATTGGAGTGA#
C. macrosperma	TGAGGTAGTAGGTTGTATAGTT3	TGAGGTAGGCTCAGTAGATGTGA1,3	TGAGGTAGTTTGCAATGTTGTCG3#	TGAGGTAGGTGCGAGAAATGA1,3	no mir-795	TGAGGTAGAATCAATTGCAGTGA3#	TCCCTGAGACCTCAAGTGTGA1,3
C. sulstoni	no let-7	TGAGGTAGGCTCAGTAGATGTGA1,3	TGAGGTAGTTTGTAATGTTGTCG3#	TGAGGTAGGTGCGAGAAATG1,3	no mir-795	TGAGGTAGGATCAAATTGAGTGA3#	TCCCTGAGACCTCAAGTGTGA1,3
C. afra	no let-7	TGAGGTAGGCTCAGTAGATGTGA1	TGAGGTAGTATGTAATGTTGTCG#	TGAGGTAGGTGCGAGAAATG1	no mir-795	TGAGGTAGGATCCAACCGAGCGA#	TCCCTGAGACCTCAAGTGTGA1
C. japonica	no let-7	TGAGGTAGGCTTTGTAGATGTGA1	TGAGGTAGTATTTAATGTTGTTG#	TGAGGTAGGTGCGAGAAATGA1	no mir-795	AGAGGTAGGATCGATTGGAGTAGA#	TCCCTGAGACCTCAAGTGTGA1
C. guadeloupensis	TGAGGTAGTAGGTTGTATAGTT	no mir-48	TGAGGTAGTTTGTAAAGTTGTCG	no mir-241	no mir-795	no mir-12463	TCCCTGAGACCTCAAGTGTGA
C. uteleia	TGAGGTAGTAGGTTGTATAGTT	no mir-48	TGAGGTAGTTTGTAATGTTGTAG	no mir-241	no mir-795	no mir-12463	TCCCTGAGACCTCAAGTGTGA
C. quiockensis	TGAGGTAGTAGGTTGTATAGTT	no mir-48	TGAGGTAGTTTAAAATGTTGTCG	no mir-241	no mir-795	no mir-12463	TCCCTGAGACCTCAAGTGTGA
							TCCCTGAGTCCTCAAATGTGA
C. castelli	TGAGGTAGTAGGTTGTATAGTT	no mir-48	TGAGGTAGTTTAAAATGTTGTCG	no mir-241	no mir-795	no mir-12463	TCCCTGAGACCTCAAGTGTGA
C. angaria	TGAGGTAGTAGGTTGTATAGTT	no mir-48	TGAGGTAGTTTAAAATGTTGTCG	no mir-241	no mir-795	no mir-12463	TCCCTGAGACCTCAAGTGTGA (2 copies)
C. vivipara	TGAGGTAGTAGGTTGTATAGTT	no mir-48	TGAGGTAGTTTAAAATGTTGTCG	no mir-241	no mir-795	no mir-12463	TCCCTGAGACCTCAAGTGTGA
C. virilis	TGAGGTAGTAGGTTGTATAGTT	no mir-48	TGAGGTAGTTTGAAATGTTGTCG	no mir-241	no mir-795	no mir-12463	TCCCTGAGACCTCAAGTGTGA
C. plicata	TGAGGTAGTAGGTTGTATAGTT	no mir-48	TGAGGTAGTTTTCGATGTTGTCG	no mir-241	no mir-795	no mir-12463	TCCCTGAGACCTCAAGTGTGA
C. bovis	AGAGGTAGTAGGTTGTATAGTT	no mir-48	TGAGGTAGTTTTAAATGTTGTCG	no mir-241	no mir-795	no mir-12463	TCCCTGAGACCTCAAGTGTGA
C. parvicauda	AGAGGTAGTAGGTTGTATAGTT	no mir-48	no mir-84	no mir-241	no mir-795	no mir-12463	TCCCTGAGACCTCAAGTGTGA
C. monodelphis	TGAGGTAGTAGGTTGTATAGTT	no mir-48	TGAGGTAGTATTAAATGTTGTCG	no mir-241	no mir-795	no mir-12463	TCCCTGAGACCTCAAGTGCGA
List of all predicted and confirmed let-7-family and lin-4 microRNA sequences in all Caenorhabditis species used in this study. Outlined in the green box are species recovered in the Elegans group. Outlined in the red box are species recovered in the Japonica group.
1confirmed using FirePlex assay
2confirmed in previous study
3confirmed using small RNA sequencing
*unable to distinguish which copy was detected in FirePlex assay
#likely in mir-84 polycistron
