# Supplementary material
Source: publisher figshare collection journal article supplement (https://gsajournals.figshare.com/articles/dataset/_/13557194)
Supplement: Supplementary file 1 [file 1]

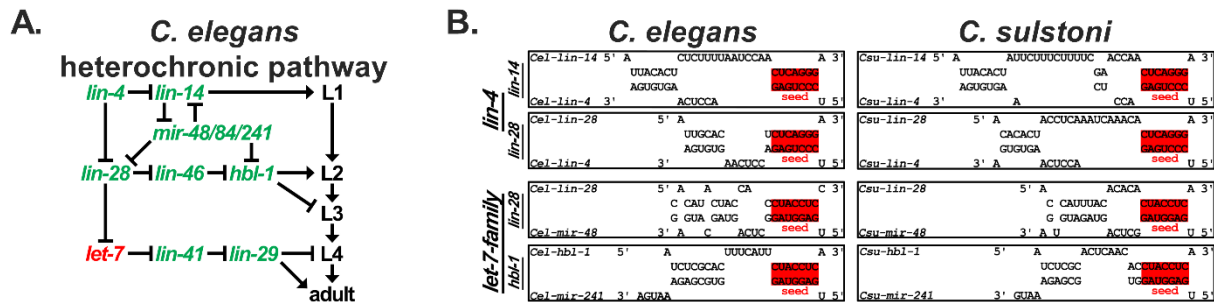

**Figure S7** Integration of *lin-4* and the *let-7*-family microRNAs into the heterochronic pathway is conserved between *C. elegans* and *C. sulstoni*. (A) Genetic diagram of the heterochronic pathway in *C. elegans*. Genes in green font are conserved in *C. sulstoni*. Gene in red font is not found in *C. sulstoni*. Adapted from Resnick et al., 2010. (B) Predicted base pairing of *lin-4* microRNA with a representative complementary site in the *lin-14* mRNA 3' UTR and with the complementary site in the *lin-28* mRNA 3' UTR (top two rows), predicted base pairing of miR-48 with the complementary site in the *lin-28* mRNA 3' UTR (third row), and predicted base pairing of miR-241 with a representative complementary site in the *hbl-1* mRNA 3' UTR (fourth row) in *C. elegans* (left column) and *C. sulstoni* (right column).
