# Supplementary material
Source: publisher figshare collection journal article supplement (https://gsajournals.figshare.com/articles/dataset/_/13557194)
Supplement: Supplementary file 2 [file 1]

# *lin-41* gene tree in *Caenorhabditis* species

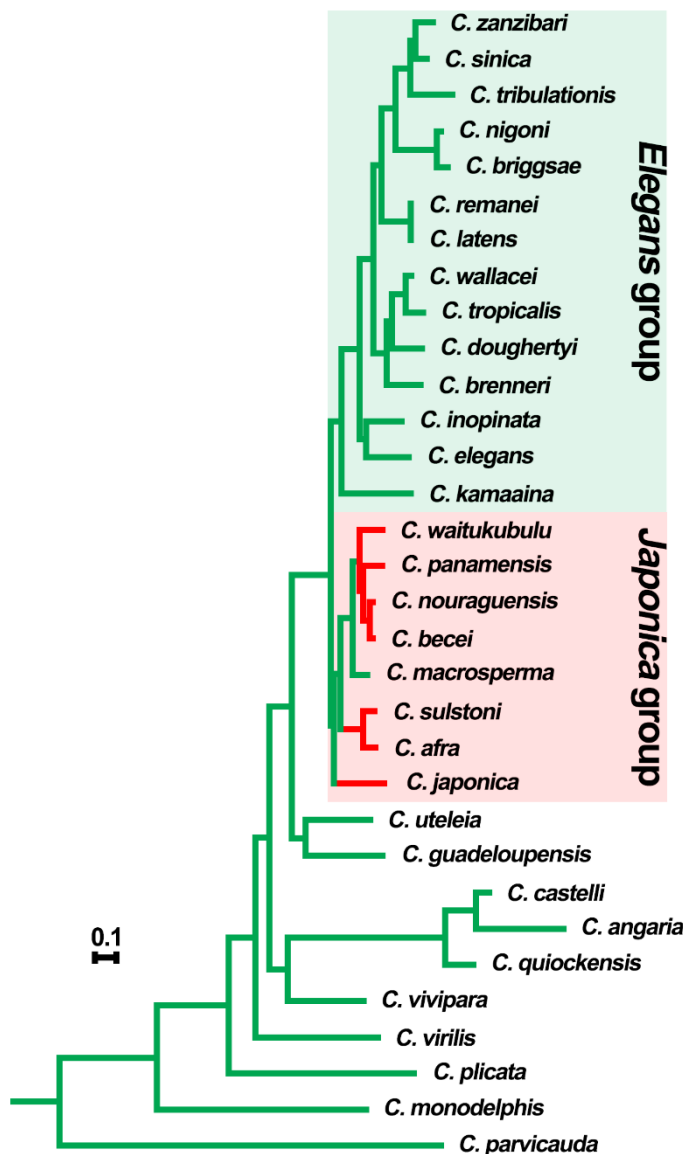

**Figure S6** Gene tree of *lin-41* protein sequence in *Caenorhabditis* species based on orthology clustering provided by the *Caenorhabditis* Genomes Project (Stevens, 2020). Green branches highlight species that are either predicted or confirmed to have *let-7*. Red branches highlight species that are either predicted or confirmed to lack *let-7*. Outlined in the green box are species belonging to the *Elegans* group. Outlined in the red box are species belonging to the *Japonica* group. Branch lengths are in substitutions per site. Scale bar is shown.
