# Supplementary material
Source: publisher figshare collection journal article supplement (https://gsajournals.figshare.com/articles/dataset/_/13557194)
Supplement: Supplementary file 4 [file 1]

A.

*C. sulstoni* genomic synteny with *C. elegans* *let-7* locus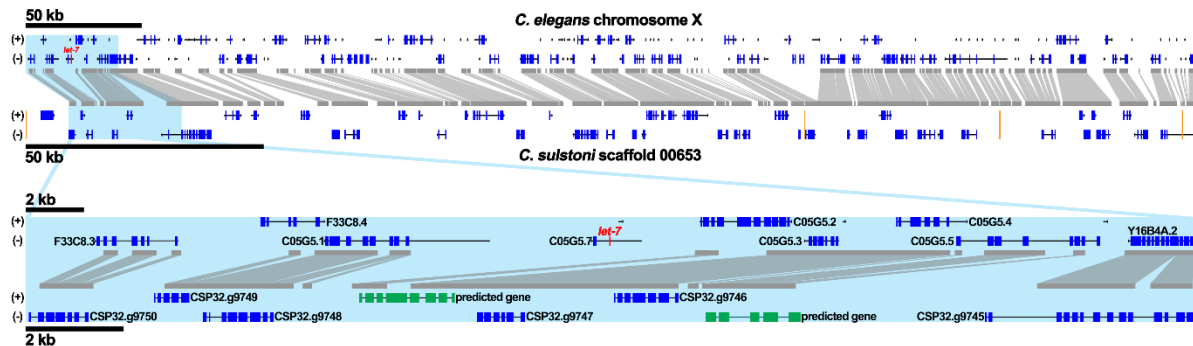

B.

*C. macrosperma* genomic synteny with *C. elegans* *let-7* locus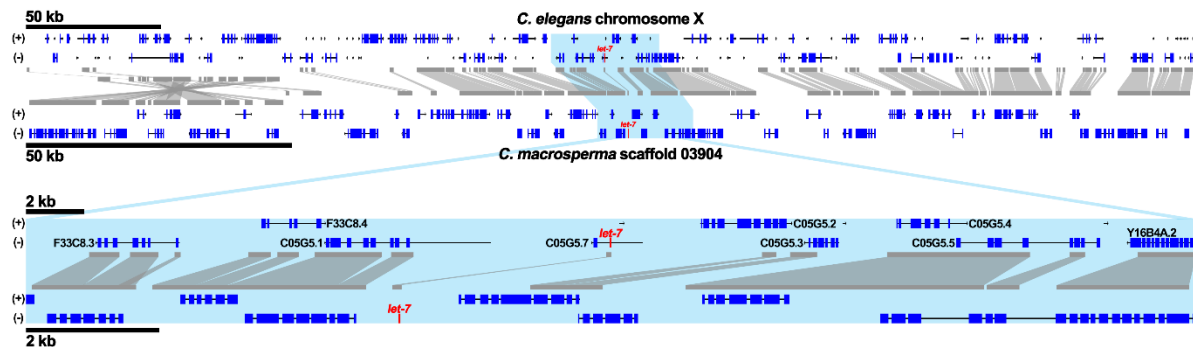

**Figure S2** Expanded view: Synteny of a portion of *C. elegans* chromosome X containing the *let-7* sequence with *C. sulstoni* scaffold 00653 (A) and with *C. macrosperma* scaffold 03904 (B). Regions with sequence similarity are outlined in gray. Sequence gaps are shown in orange. *let-7* is shown in red. Annotated genes are shown in blue. Predicted genes are shown in green. Highlighted in light blue are zoomed in views (as shown in Fig. 1) of the *C. elegans* *let-7* locus and its respective synteny with *C. sulstoni* (A) and *C. macrosperma* (B).
