# Supplementary material
Source: publisher figshare collection journal article supplement (https://gsajournals.figshare.com/articles/dataset/_/13557194)
Supplement: Supplementary file 5 [file 1]

### *C. macrosperma let-7* Sanger sequencing

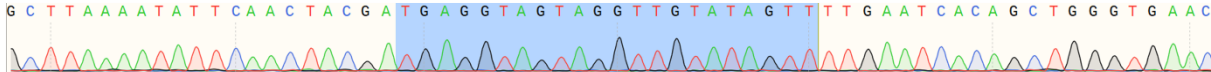

**Figure S1** Sanger sequencing confirming the *let-7* microRNA sequence (highlighted in blue) in the *C. macrosperma* genome.
