# Supplementary material
Source: publisher figshare collection journal article supplement (https://gsajournals.figshare.com/articles/dataset/_/13557194)
Supplement: Supplementary file 6 [file 1]

**A.**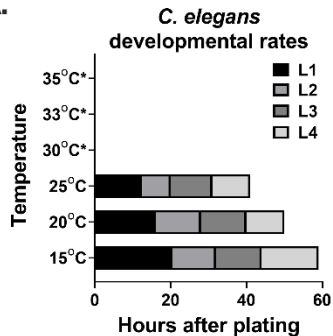**B.**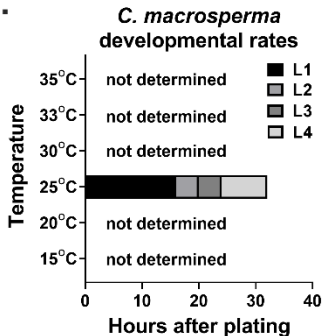**C.**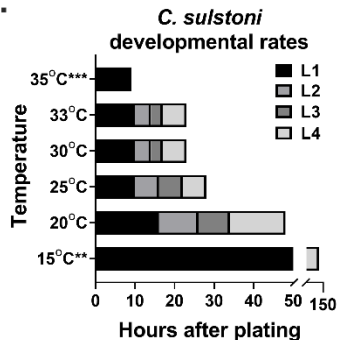

**Figure S4** Developmental growth rates of L1 arrested *C. elegans* (A), *C. sulstoni* (B), and *C. macrosperma* (C) at various temperatures. \*animals did not exit L1 arrest. \*\*animal development was asynchronous; timing of first animals reaching adulthood is shown. \*\*\*animals failed to exit L1 molt.
