# Supplementary material
Source: publisher figshare collection journal article supplement (https://gsajournals.figshare.com/articles/dataset/_/13557194)
Supplement: Supplementary file 7 [file 1]

A.

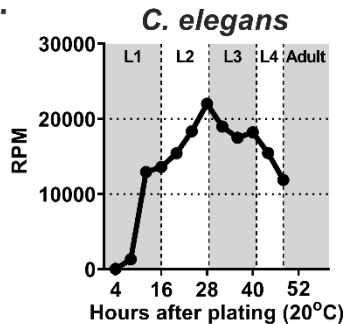

B.

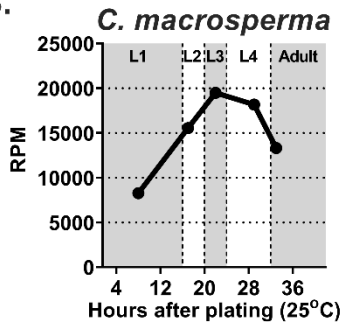

C.

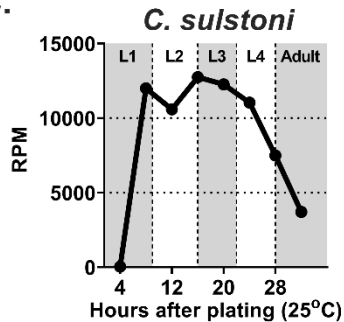

**Figure S5** Small RNA sequencing data showing expression of *lin-4* microRNA throughout *C. elegans* (A), *C. macrosperma* (B), and *C. sulstoni* (C) development. RPM refers to reads per million.
