# Supplementary material
Source: publisher figshare collection journal article supplement (https://gsajournals.figshare.com/articles/dataset/_/13557194)
Supplement: Supplementary file 8 [file 1]

**A.**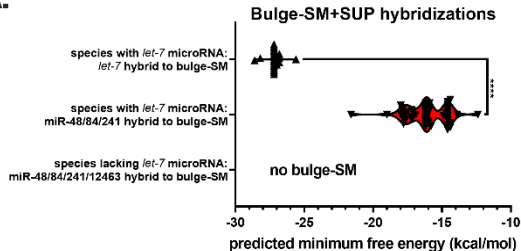**B.**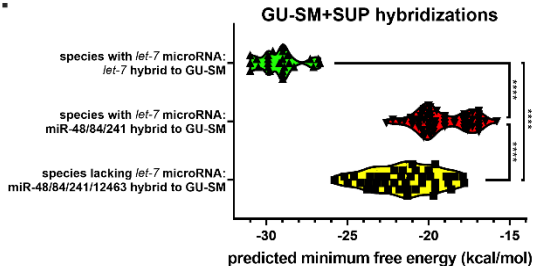

**Figure S8** Among *let-7*-family microRNAs, *let-7* microRNA has the most favorable hybridization to the lin-41 mRNA 3' UTR SMs. Predicted hybridization MFEs of *let-7*-family microRNAs with the lin-41 mRNA 3' UTR bulge-SM+SUP (A) and GU-SM+SUP (B) in *Caenorhabditis* species. Statistical significance was determined using a two-tailed Student's t-test. \*\*\*\*  $P \leq 0.0001$ .
